# Supplementary material
Source: publisher figshare collection journal article supplement (https://karger.figshare.com/ndownloader/files/35969627)
Supplement: Supplementary file 1 [file 35969627]

**Online supplementary material**

Table of Contents

1. Definitions
2. Search Strategy
3. Forest Plots
4. Conversion Formula used to convert Median (IQR) to Mean (SD)
5. Characteristics of excluded studies:
6. Detailed risk of bias assessment using RoB 2 tool
7. **Definitions**
   1. **Retinopathy of prematurity (International Classification of Retinopathy of Prematurity, Revisited 2005)**

**Stages:**

**Stage 1-3 (Acute stage)- The** appearance of a structure at the vascular–avascular juncture as

**Stage 1**: Demarcation line,

Stage 2: Ridge, and

Stage 3: Extraretinal neovascular proliferation or flat neovascularization.

**Stages 4 and 5 (Retinal Detachment)**

**Stage 4**: Partial: 4A with fovea attached, 4B with fovea detached and

**Stage 5**: Stage 5A, in which the optic disc is visible by ophthalmoscopy (suggesting open-funnel detachment); stage 5B, in which the optic disc is not visible because of retrolental fibrovascular tissue or closed-funnel detachment; and stage 5C, in which stage 5B is accompanied by anterior segment changes (e.g., marked anterior chamber shallowing, iridocorneolenticular adhesions, corneal opacification), suggesting closed-funnel configuration.

Garcia et al 15 : Severe ROP: Severity of ROP was defined as any stage with plus, or stages 3–5 with or without plus disease, which have a higher risk for vision impairment, including blindness

Hellstrom et al 14 : Severe ROP is defined as ROP stage 3 and/or type 1 ROP) according to the international ROP classification.

Khalesi et al 21: Severity of ROP was defined according to the International Classification of Retinopathy of Prematurity as no ROP, ROP grade I, ROP grade II, and ROP grade III

Collins et al 20: Unilateral and bilateral stage ≥3, unilateral and bilateral requiring treatment Defined as:

- worst stage of retinopathy of prematurity in eyes prior to going home
- therapy for retinopathy of prematurity either eye

Carlson et al 19 : defined according to international ROP classification.

Fewtrell et al 22 : not defined

Clandinin et al 25: not defined

Robinson et al 24: not defined

Frost et al23 : not defined

- 1. **Bronchopulmonary dysplasia (**National Institute of Child Health and Human Development [NICHD] definitions)

Oxygen need for > 28 days and at 36 weeks PMA to identify different severity of BPD

|  | **Gestational age** |  |
| --- | --- | --- |
|  | **<32 weeks** | **>32 weeks** |
| **Time point of assessment** | 36 weeks postmenstrual age (PMA)/ discharge | >28 days but <56 days/ discharge whichever is earlier |
| **Mild** | Breathing room air at 36 weeks PMA or discharge | Breathing room air at 56 days postnatal age or discharge |
| **Moderate** | Need for <30% O2 at 36 weeks PMA or discharge | Need for <30% O2 at 56 days postnatal age or discharge |
| **Severe** | Need for > 30% oxygen and/or positive pressure (IMV/CPAP) at 36 weeks PMA or discharge | Need for > 30% oxygen and/or positive pressure (IMV/CPAP) at 56 days postnatal age or discharge |

**2 . Search strategy:**

We conducted a comprehensive search that included the Cochrane Central Register of Controlled Trials (CENTRAL; January 1990 to 31st July 2021), in the Cochrane Library; MEDLINE via PubMed (January 1990 to 31st July 2021); Embase (January 1990 to 31st July 2021); Ovid medline (January 1990 to 31st July 2021) the Cumulative Index to Nursing and Allied Health Literature (CINAHL) (January 1990 to 31st July 2021); We applied English-language restrictions for the search.

The Cochrane Library**:** (Neonate OR Neonat* OR Newborn OR Preterm OR Prematur* OR Premature OR Infant OR Low birth weight) AND (‘Fatty Acids’ OR (fatty acid*) OR ‘omega-3’ OR ‘omega-6’ OR ‘LCPUFA’ OR PUFA OR docosahexaenoic acid OR docosahexanoic acid* OR docosahexenoic acid* OR eicosapentaenoic acid* OR eicosapentanoic acid* OR eicosapentenoic acid* OR ‘Fish oils’ OR ‘fish oil’ OR linolen* OR ‘alpha-linolen*’ OR ‘linolenic acids’ OR (DHA or EPA) OR Linseed oil OR ‘enteral lipids’ OR ‘omega 3 fatty acids’ OR ‘omega 6 fatty acids’ OR ‘ω-6 Long chain polyunsaturated fatty acids’ OR ‘ω-3 Long chain polyunsaturated fatty acids’ OR (DHA OR ARA) OR arachidonic acid OR arachidonic* acid) AND (“Retinopathy of prematurity” OR ‘ROP’ OR retinopathy* OR ‘retrolental fibroplasia’)

PubMed: **:** (Neonate OR Neonat* OR Newborn OR Preterm OR Prematur* OR Premature OR Infant OR Low birth weight) AND (‘Fatty Acids’ OR (fatty acid*) OR ‘omega-3’ OR ‘omega-6’ OR ‘LCPUFA’ OR PUFA OR docosahexaenoic acid OR docosahexanoic acid* OR docosahexenoic acid* OR eicosapentaenoic acid* OR eicosapentanoic acid* OR eicosapentenoic acid* OR ‘Fish oils’ OR ‘fish oil’ OR linolen* OR ‘alpha-linolen*’ OR ‘linolenic acids’ OR (DHA or EPA) OR Linseed oil OR ‘enteral lipids’ OR ‘omega 3 fatty acids’ OR ‘omega 6 fatty acids’ OR ‘ω-6 Long chain polyunsaturated fatty acids’ OR ‘ω-3 Long chain polyunsaturated fatty acids’ OR (DHA OR ARA) OR arachidonic acid OR arachidonic* acid) AND (“Retinopathy of prematurity” OR ‘ROP’ OR retinopathy* OR ‘retrolental fibroplasia’)

Embase: ('low birth weight'/exp OR 'newborn'/exp OR 'prematurity'/exp) AND ('fatty acid'/exp OR 'omega 3 fatty acid'/exp OR 'omega 6 fatty acid'/exp OR 'docosahexanoic acid'/exp OR 'icosapentaenoic acid'/exp OR 'fish oil'/exp OR 'linolenic acid'/exp OR 'linseed oil'/exp OR 'dha'/exp OR 'arachidonic acid'/exp) AND 'retrolental fibroplasia'/exp

CINAHL: (Neonate OR Neonat* OR Newborn OR Preterm OR Prematur* OR Premature OR Infant OR Low birth weight) AND (‘Fatty Acids’ OR (fatty acid*) OR ‘omega-3’ OR ‘omega-6’ OR ‘LCPUFA’ OR PUFA OR docosahexaenoic acid OR docosahexanoic acid* OR docosahexenoic acid* OR eicosapentaenoic acid* OR eicosapentanoic acid* OR eicosapentenoic acid* OR ‘Fish oils’ OR ‘fish oil’ OR linolen* OR ‘alpha-linolen*’ OR ‘linolenic acids’ OR (DHA or EPA) OR Linseed oil OR ‘enteral lipids’ OR ‘omega 3 fatty acids’ OR ‘omega 6 fatty acids’ OR ‘ω-6 Long chain polyunsaturated fatty acids’ OR ‘ω-3 Long chain polyunsaturated fatty acids’ OR (DHA OR ARA) OR arachidonic acid OR arachidonic* acid) AND (“Retinopathy of prematurity” OR ‘ROP’ OR retinopathy* OR ‘retrolental fibroplasia’) Restrictions: Human RCT

Ovid Medline: (Neonate OR Neonat* OR Newborn OR Preterm OR Prematur* OR Premature OR Infant OR Low birth weight) AND (‘Fatty Acids’ OR (fatty acid*) OR ‘omega-3’ OR ‘omega-6’ OR ‘LCPUFA’ OR PUFA OR docosahexaenoic acid OR docosahexanoic acid* OR docosahexenoic acid* OR eicosapentaenoic acid* OR eicosapentanoic acid* OR eicosapentenoic acid* OR ‘Fish oils’ OR ‘fish oil’ OR linolen* OR ‘alpha-linolen*’ OR ‘linolenic acids’ OR (DHA or EPA) OR Linseed oil OR ‘enteral lipids’ OR ‘omega 3 fatty acids’ OR ‘omega 6 fatty acids’ OR ‘ω-6 Long chain polyunsaturated fatty acids’ OR ‘ω-3 Long chain polyunsaturated fatty acids’ OR (DHA OR ARA) OR arachidonic acid OR arachidonic* acid) AND (“Retinopathy of prematurity” OR ‘ROP’ OR retinopathy* OR ‘retrolental fibroplasia’)

**Results Database Searches:**

Cochrane central: 52

PubMed: 184

Embase: 138

Cinahl: 59

Ovid medline: 117

Gross: 550

Duplicates: 339

Net screened: 211

1. **Forest Plots showing the effect of enteral lipids compared to control on preterm babies for a) Severe ROP) b) Any ROP ( studies which measured ROP as primary outcome)**

**Any ROP**

a


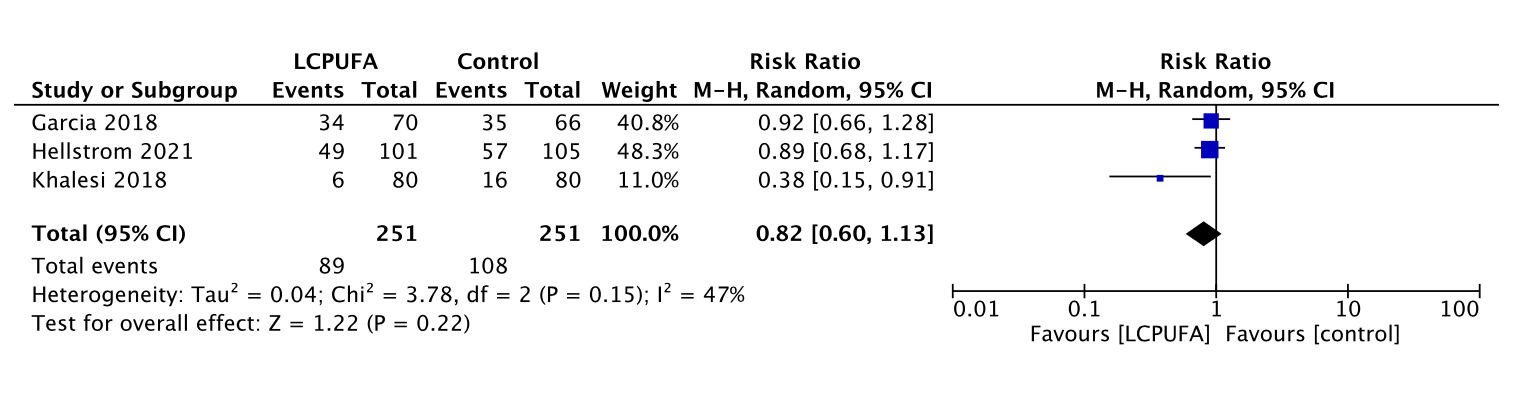


**Severe ROP**

b


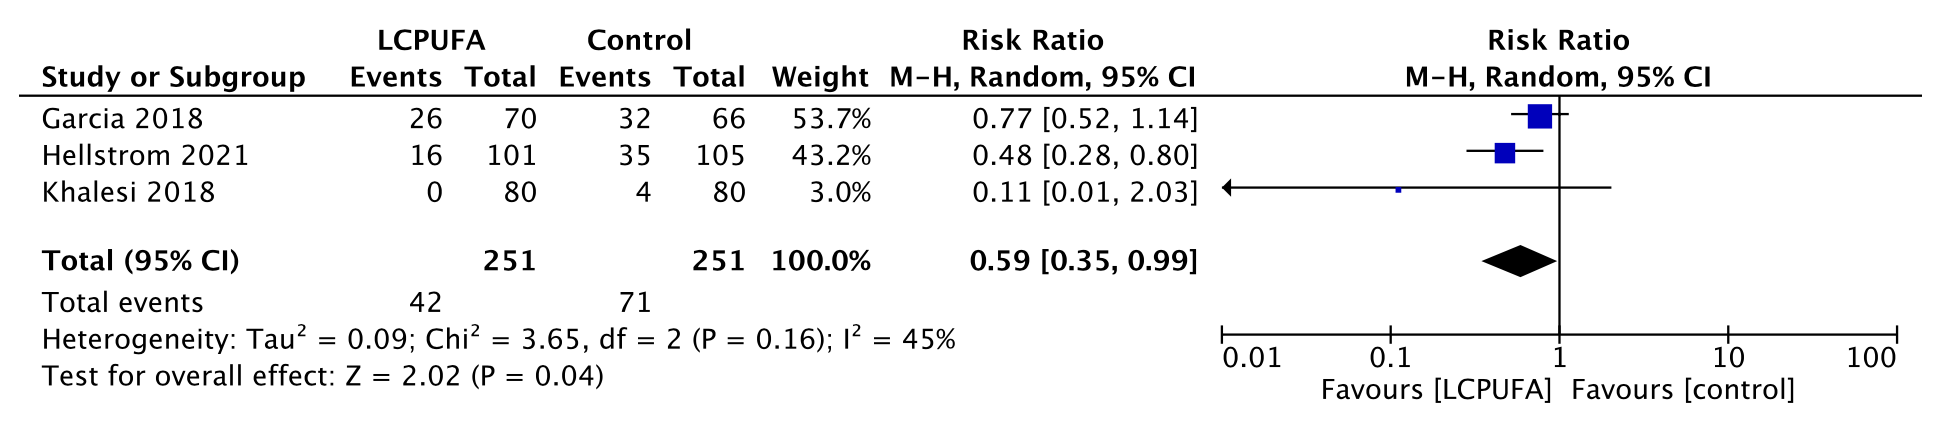


**Forest Plots for Secondary Outcomes: a) ROP needing treatment b) Death c) Bronchopulmonary Dysplasia d) Necrotising Enterocolitis (CI: Confidence Interval; M-H: Mantel Haenszel**

a

**ROP needing treatment**


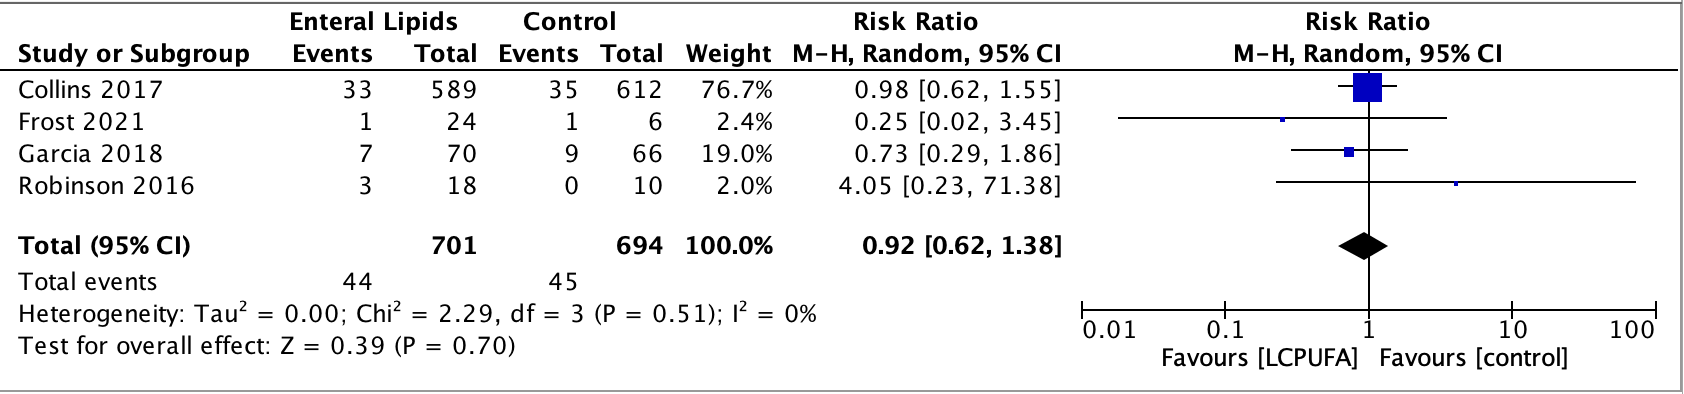


**Death**

b


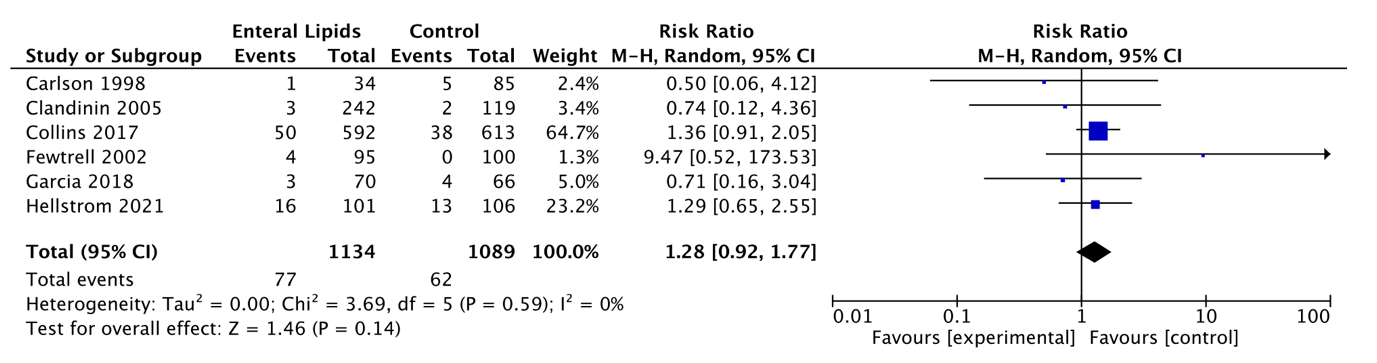


c

**BPD**


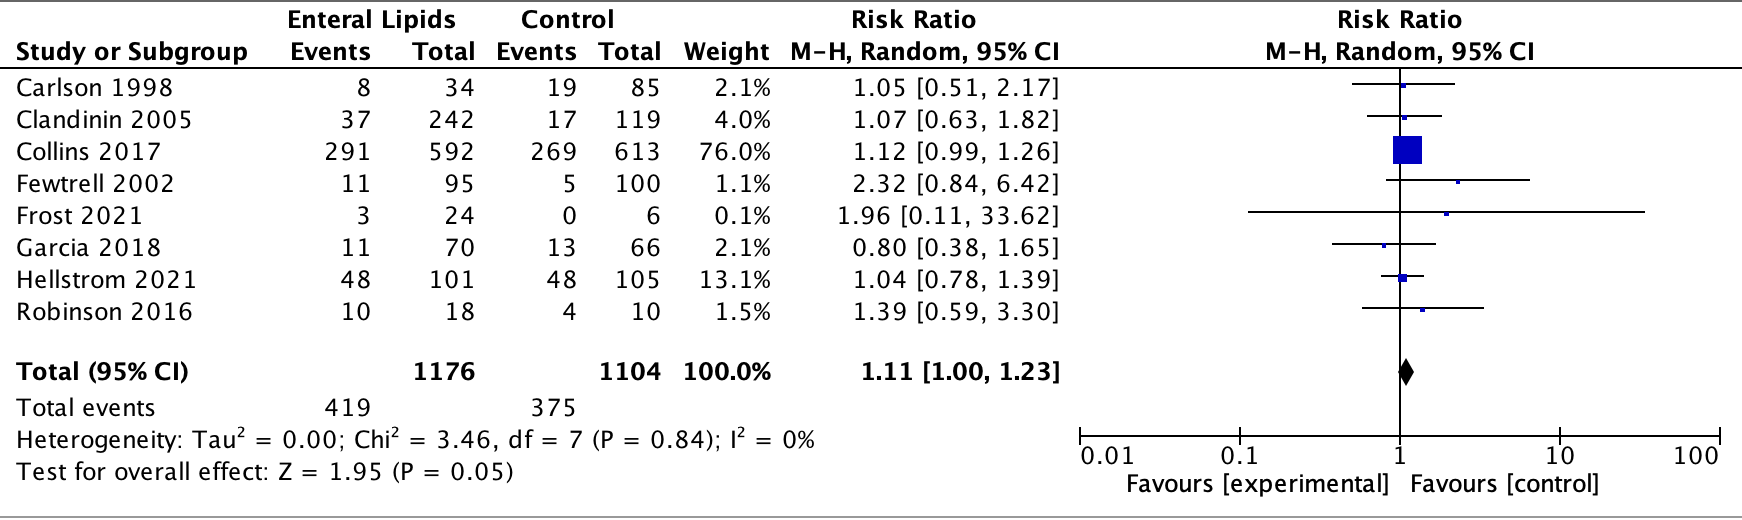


d

**NEC**


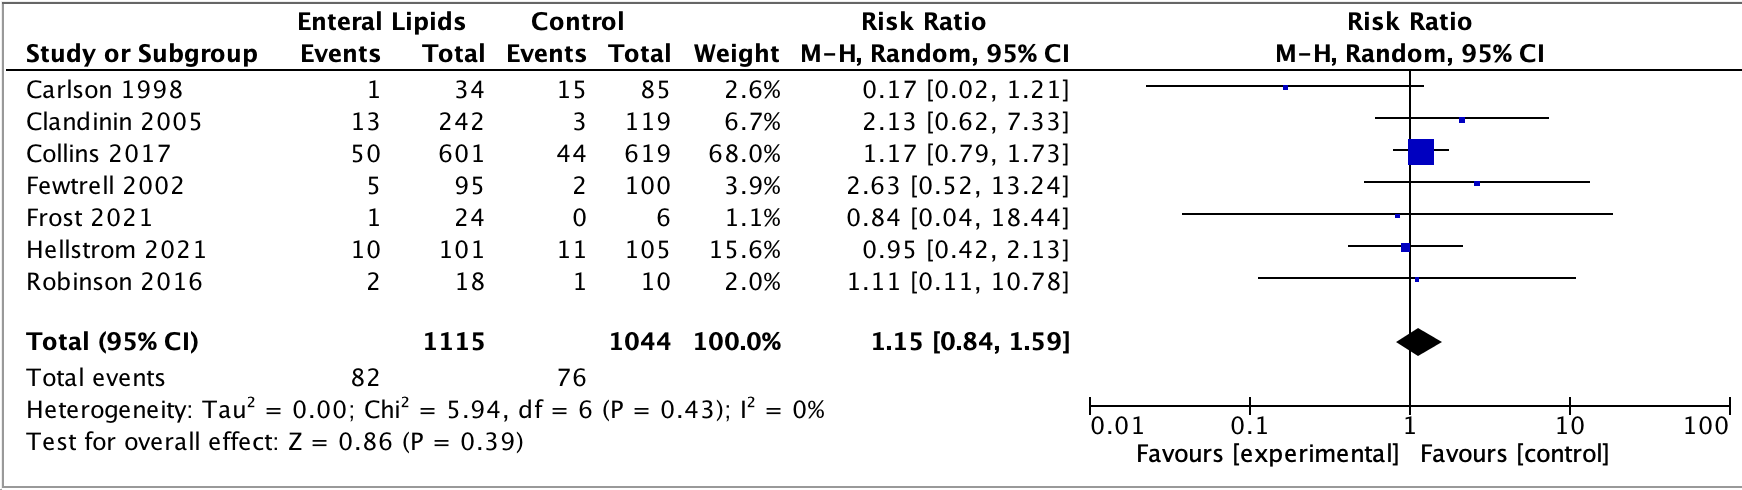


1. **Conversion Formula used to convert Median (IQR) to Mean (SD)**

**Conversion formulae used**

Derivation of mean from median

N< 25: 2 x median + lower end of range + upper end of range

4

N> 25: = median

Derivation of standard deviation

a) From interquartile range: Quartile 3 – Quartile 1

1.35

b) From range

N< 15: (lower end of range + upper end of range – 2 x median/ 4)2 + (upper end of range – lower end of range)2

12

N= 15 – 70: Range/ 4

N> 70: Range/ 6

c) From 95% confidence intervals

N> 100: (upper confidence limit – lower confidence limit) x N

3.92

N< 60: Replace 3.92 with a number specific to sample size. Calculated using TINV function of excel: =tinv(1-0.95, N-1); multiply by 2

1. **Characteristics of excluded studies:**

| **S no** | **Author, Year** | **Title** | **Reason for exclusion** |
| --- | --- | --- | --- |
| 1 | Beken et al, 2014 | The influence of fish-oil lipid emulsions on retinopathy of prematurity in very low birth weight infants: a randomized controlled trial. | Parenteral administration |
| 2 | Smithers et al, 2008 | Effect of long-chain polyunsaturated fatty acid supplementation of preterm infants on disease risk and neurodevelopment: a systematic review of randomized controlled trials. | Systematic review of LCPUFA formulas |
| 3 | Euctr et al 2017 | The effects of the fatty acids arachidonic acid (ARA) and docosahexaenoic acid (DHA) on growth, metabolism and inflammatory response in infants born extremely preterm | Parenteral administration |
| 4 | Euctr et al 2008 | Can supplementation with Omega-3 fatty acids in preterm infants improve visual and cognitive outcome? | Parenteral administration |
| 5 | Hartnett 2018 | The Prematurity of Recommending Particular Polyunsaturated Fatty Acid Supplements for Retinopathy of Prematurity. | Wrong publication type: Invited commentary |
| 6 | Löfqvist CA et al, 2018 | Association of Retinopathy of Prematurity With Low Levels of Arachidonic Acid: A Secondary Analysis of a Randomized Clinical Trial | Parenteral administration |
| 7 | Löfqvist CA et al, | Preterm infants with late retinopathy of prematurity receive less dietary omega-3 and omega-6 the first two weeks of life | Parenteral administration |
| 8 | Clinical trial 2015 | Omega-3 LCPUFA Supplementation in Very Low Birth Weight Infants for The Prevention Retinopathy of Prematurity | Ongoing clinical trial- both parenteral & enteral |
| 9 | Clinical trial 2016 | A Fatty Acids Study in Preventing Retinopathy of Prematurity | Parenteral administration |
| 10 | Garcia, 2018 | Enteral Administration of Docosahexaenoic Acid to Prevent Retinopathy of Prematurity | Duplication of another study (Garcia) |
| 11 | Clinical trials, 2017 | Multi-Center Study to Determine the Role of Fatty Acids in Serum in Preventing Retinopathy of Prematurity (MDM) | Ongoing clinical trial- both parenteral & enteral |
| 12 | Talkad et al, 2020 | Strategies to Prevent Severe Retinopathy of Prematurity: A 2020 Update and Meta-analysis | Review article |
| 13 | Wezel-Meijler et al, 2002 | Dietary supplementation of long-chain polyunsaturated fatty acids in preterm infants: Effects on cerebral maturation | Desired outcomes not available |
| 14 | **Makrides et al 2009** | **Neurodevelopmental outcomes of preterm infants fed high-dose docosahexaenoic acid: a randomized controlled trial** | **Maternal supplementation of LCPUFA** |
| 15 | **Manley et al 2011** | **High-dose docosahexaenoic acid supplementation of preterm infants: respiratory and allergy outcomes** | **Maternal supplementation of LCPUFA** |
| **16** | **Baack et al 2016** | **Docosahexaenoic acid and bronchopulmonary dysplasia in preterm infants.** | **Primary outcome (ROP) data not available** |
| **17** | [**Skouroliakou**](https://aspenjournals.onlinelibrary.wiley.com/action/doSearch?ContribAuthorRaw=Skouroliakou%2C+Maria) **et al 2015** | **Parenteral MCT/ω-3 Polyunsaturated Fatty Acid-Enriched Intravenous Fat Emulsion Is Associated With Cytokine and Fatty Acid Profiles Consistent With Attenuated Inflammatory Response in Preterm Neonates: A Randomized, Double-Blind Clinical Trial** | **Parenteral lipid supplementation** |
| **18** | [**Rita D'Ascenzo**](https://pubmed.ncbi.nlm.nih.gov/?term=D%27Ascenzo+R&cauthor_id=24525115)**et al**  **2014** | **Higher docosahexaenoic acid, lower arachidonic acid and reduced lipid tolerance with high doses of a lipid emulsion containing 15% fish oil: a randomized clinical trial** | **Parenteral lipid supplementation** |
| **19** | **Moltu et al 2014** | **Enhanced feeding and diminished postnatal growth failure in very-low-birth-weight infants** | **Intervention was mixed (parenteral and enteral) supplementation. Our study focused on exclusive enteral supplementation** |
| **20** | **Beken et al 2014** | **The influence of fish-oil lipid emulsions on retinopathy of prematurity in very low birth weight infants: a randomized controlled trial** | **Parenteral lipid supplementation** |
| **21** | **Makrides M et al 2009** | **Neurodevelopmental outcomes of preterm infants fed high-dose docosahexaenoic acid: a randomized controlled trial** | **Maternal (not infant ) Supplementation of DHA** |
| **22** | **Manley BJ et al 2011** | **High-dose docosahexaenoic acid supplementation of preterm infants: respiratory and allergy outcomes** | **Maternal (not infant) Supplementation of DHA** |
| **23** | **Fewtrell et al 2004** | **Randomized, double-blind trial of long- chain polyunsaturated fatty acid supplementation with fish oil and borage oil in preterm infants** | **Primary Outcome data**  **(ROP) not available** |
| **24** | **Grohwargo et al 2005** | **Body composition in preterm infants who are fed long-chain polyunsaturated fatty acids: a prospective, randomized, controlled trial** | **Primary Outcome data ( ROP) not available . Study was aimed at measuring body composition in preterm infants who were fed enteral LCPUFA** |
| **25** | **O’connor et al 2001** | **Ross Preterm Lipid Study. Growth and development in preterm infants fed long-chain polyunsaturated fatty acids: a prospective, randomized controlled trial.** | **Primary Outcome data**  **(ROP) not available. ROP outcome not measured** |

1. **Detailed risk of bias assessment using RoB 2 tool**

#### Sequence generation (checking for possible selection bias). Was the allocation sequence adequately generated?

For each included study, we categorised the method used to generate the allocation sequence as:

- low risk (any truly random process, e.g. random number table; computer random number generator);
- high risk (any non‐random process, e.g. odd or even date of birth; hospital or clinic record number); or
- unclear risk.

#### Allocation concealment (checking for possible selection bias). Was allocation adequately concealed?

For each included study, we categorised the method used to conceal the allocation sequence as:

- low risk (e.g. telephone or central randomisation; consecutively numbered sealed opaque envelopes);
- high risk (open random allocation; unsealed or non‐opaque envelopes, alternation; date of birth); or
- unclear risk.

#### Blinding of participants and personnel (checking for possible performance bias). Was knowledge of the allocated intervention adequately prevented during the study?

For each included study, we categorised the methods used to blind study participants and personnel from knowledge of which intervention a participant received. We assessed blinding separately for different outcomes or classes of outcomes. We categorised methods as:

- low risk, high risk, or unclear risk for participants; and
- low risk, high risk, or unclear risk for personnel.

#### Blinding of outcome assessment (checking for possible detection bias). Was knowledge of the allocated intervention adequately prevented at the time of outcome assessment?

For each included study, we categorised the methods used to blind outcome assessment. We assessed blinding separately for different outcomes or classes of outcomes. We categorised the methods as:

- low risk for outcome assessors;
- high risk for outcome assessors; or
- unclear risk for outcome assessors.

#### Incomplete outcome data (checking for possible attrition bias through withdrawals, dropouts, protocol deviations). Were incomplete outcome data adequately addressed?

For each included study and for each outcome, we described completeness of data including attrition and exclusions from analysis. We noted whether attrition and exclusions were reported, numbers included in the analysis at each stage (compared with total randomised participants), reasons for attrition or exclusion when reported, and whether missing data were balanced across groups or were related to outcomes. When trial authors reported or supplied sufficient information, we re‐included missing data in the analyses. We categorised methods as:

- low risk (< 20% missing data);
- high risk (≥ 20% missing data); or
- unclear risk.

#### Selective reporting bias. Are reports of the study free of the suggestion of selective outcome reporting?

For each included study, we described how we investigated the possibility of selective outcome reporting bias and what we found. We assessed the methods as:

- low risk (when it is clear that all of the study's prespecified outcomes and all expected outcomes of interest to the review have been reported);
- high risk (when not all of the study's prespecified outcomes have been reported; one or more reported primary outcomes were not prespecified outcomes of interest and are reported incompletely and so cannot be used; study fails to include results of a key outcome that would have been expected to have been reported); or
- unclear risk.
